## RESEARCH ARTICLE

# Prenatal phthalate exposure and sex steroid hormones in newborns: Taiwan Maternal and Infant Cohort Study

Chin-Li Lu<sup>1,2,3</sup>, Hui-Ju Wen<sup>4</sup>, Mei-Lien Chen<sup>5</sup>, Chien-Wen Sun<sup>4</sup>, Chia-Jung Hsieh<sup>6</sup>, Ming-Tsang Wu<sup>7</sup>, Shu-Li Wang<sup>4,8\*</sup>, TMICS study group<sup>¶</sup>

**1** Graduate Institute of Food Safety, College of Agriculture and Natural Resources, National Chung Hsing University, Taichung, Taiwan, **2** Department of Food Science and Biotechnology, College of Agriculture and Natural Resources, National Chung Hsing University, Taichung, Taiwan, **3** Department of Post-Baccalaureate Medicine, College of Medicine, National Chung Hsing University, Taichung, Taiwan, **4** National Institute of Environmental Health Sciences, National Health Research Institutes, Miaoli, Taiwan, **5** Institute of Environmental and Occupational Health Sciences, College of Medicine, National Yang Ming Chiao Tung University, Taipei, Taiwan, **6** Department of Public Health, Tzu Chi University, Hualien, Taiwan, **7** Graduate Institute of Clinical Medicine, Kaohsiung Medical University, Kaohsiung, Taiwan, **8** Department of Safety, Health, and Environmental Engineering, National United University, Miaoli, Taiwan

¶ For the full list of TMICS study group, please refer to the Acknowledgments section.

\* [slwang@nhri.edu.tw](mailto:slwang@nhri.edu.tw)

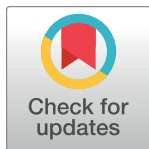

## OPEN ACCESS

**Citation:** Lu C-L, Wen H-J, Chen M-L, Sun C-W, Hsieh C-J, Wu M-T, et al. (2024) Prenatal phthalate exposure and sex steroid hormones in newborns: Taiwan Maternal and Infant Cohort Study. PLoS ONE 19(3): e0297631. <https://doi.org/10.1371/journal.pone.0297631>

**Editor:** Iman Al-Saleh, King Faisal Specialist Hospital and Research Center, SAUDI ARABIA

**Received:** August 15, 2023

**Accepted:** January 9, 2024

**Published:** March 14, 2024

**Copyright:** © 2024 Lu et al. This is an open access article distributed under the terms of the [Creative Commons Attribution License](https://creativecommons.org/licenses/by/4.0/), which permits unrestricted use, distribution, and reproduction in any medium, provided the original author and source are credited.

**Data Availability Statement:** All relevant data are publicly available from the Kaggle repository (<https://doi.org/10.34740/KAGGLE/DS/4339396>).

**Funding:** This study was funded by a grant from the Ministry of Science and Technology in Taiwan (109-2314-B-400-025-MY3) and the National Health Research Institutes (EH-102-SP-02, EH-103-SP-02, EM-110-PP05). The funders had no role in study design, data collection and analysis, decision to publish, or preparation of the manuscript. Shu-Li Wang received salary from the

## Abstract

### Background

Newborn anogenital distance (AGD) has been associated with prenatal exposure of phthalates. The association between prenatal phthalate exposure and sex steroid hormones in newborns is unclear.

### Object

This study aimed to examine whether cord-blood sex hormone levels were associated with prenatal phthalate exposure and newborn anogenital distance (AGD).

### Methods

In the Taiwan Maternal and Infant Cohort Study, we recruited 1,676 pregnant women in their third trimester in 2012–2015 in Taiwan. We determined 11 urinary phthalate metabolites in pregnant women, three maternal and five cord-blood steroid sex-hormone concentrations. Five hundred and sixty-five mother-infant pairs with sufficient data were included. Trained neonatologists measured 263 newborns' AGD. We examined the associations of prenatal phthalate metabolite levels with AGD and hormones using linear regression models and evaluated correlations between maternal and cord-blood sex hormone levels and AGD.

### Results

Compared with the male newborns exposed to maternal phthalate metabolites at the first tertile, AGD was -3.75, -3.43, and -3.53 mm shorter among those exposed at the median tertile of di-2-ethylhexyl phthalate (DEHP) metabolites, monobenzyl phthalate (MBzP), and

National Health Research Institutes, other authors received no specific funding for this work.

**Competing interests:** The authors have declared that no competing interests exist.

monomethyl phthalate (MMP), respectively. Compared with those who had exposed at the first tertile, cord-blood follicle-stimulating hormone (FSH) decreased among male newborns exposed at higher levels of MMP, mono-n-butyl phthalate (MnBP), MBzP and DEHP, and among female newborns exposed at higher levels of MMP, MBzP and mono(2-ethyl-5-hydroxyhexyl) phthalate. However, we did not observe significant correlations of maternal or cord-blood sex steroid hormones with newborns' AGDs.

## Conclusions

Alterations in cord-blood sex steroid hormone levels were associated with prenatal phthalate exposures, particularly in male newborns. Women aspiring to be pregnant should be alerted of the need of reducing phthalate exposure.

## Introduction

Phthalate esters comprise a group of chemicals found in products widely used in our daily life, such as plasticizers in polyvinyl chloride, fixatives in personal care products (PCPs), and adhesives in building materials [1]. In addition to dermal absorption and inhalation, oral ingestion of contaminated food is a major phthalate entry route of (i.e., di-2-ethylhexyl phthalate [DEHP]) into the human body [2]. Once environmental phthalates enter human body, they are rapidly hydrolyzed to monoesters and oxidized compounds.

The parent compounds and metabolites of phthalates can penetrate placenta and enter fetal circulation [3], and mimic or block the transcriptional activation of steroid hormones [4]. Cord-blood levels of sex steroid hormones are related to both hormones secreted by placenta and the circulating hormones in fetus, which potentially influence fetus' growth [5]. Investigating the effects of prenatal phthalate exposure on cord-blood sex hormones and neonatal reproductive system may further advance our understanding of the reproductive toxicity of phthalates.

In March 2011, a phthalate-tainted-foodstuff episode occurred in Taiwan. Broad food items were contaminated by fake cloudy agents containing phthalates and successively withdrawn from the shelves. After the episode, the regulations in Taiwan, consistent to EU and US, continuously restrict the use of phthalates and setting concentration limits in commonly used phthalates in toys and child care articles, food contact materials, and cosmetics [6]. Subsequent studies found that the urinary levels of phthalate metabolites in pregnant women had significantly decreased several years later [7, 8]. Nowadays, it comes to the question of whether the offspring would be exempted from disturbance on reproductive and endocrine system under the relatively low prenatal phthalate exposure in Taiwan. Despite numerous evidences have shown an inverse association between prenatal exposure of phthalates and anogenital distance (AGD) in male newborns [9–11], evidences in female newborns are rare. Moreover, to the best of our knowledge, only two epidemiological studies have assessed the effects of maternal phthalates exposure on fetal sex steroid hormones in birth cohorts, and the findings were inconclusive [12, 13].

AGD is a sensitive marker to detect anti-androgen effect in newborns, it depends on in-utero testosterone secreted from embryonic testicle from the early stage of pregnancy [14]. Experimental studies have shown reproductive malformations and fertility reductions in male offspring of pregnant rats co-administered with dibutyl phthalate and DEHP [15].

Epidemiological studies have also found a decrease in AGD in male infants associated with higher maternal monoethylhexyl phthalate (MEHP), monobenzyl phthalate (MBzP), and mono-n-butyl phthalate (MnBP) [9–11]. Prenatal exposure to phthalates may have sex-specific effects on reproductive organ development in male and female offspring. However, the adverse effects of phthalates on female reproductive outcomes have been less reported and inconclusive [16].

Numerous epidemiologic studies based on cross-sectional design had reported phthalate exposures are associated with sex steroid hormone levels [17]. However, only a few studies investigated the impact of prenatal exposure of phthalates and offspring's sex steroid hormones [16]. Among the rarely available literatures, the Hokkaido Cohort Study (HCS) only investigated MEHP levels in maternal serum and found that the effect of phthalates was more pronounced in male newborns [12, 18]. Lin et al. only reported phthalate effects on cord-blood estradiol (E2), free testosterone (frT) levels and frT/E2 ratio and observed significant associations only in female newborns [13]. Differences in target hormones, selected phthalates, exposure levels, and sample matrices may contribute to the inconsistency between studies.

Our study analyzed data from the Taiwan Maternal and Infant Cohort Study (TMICS), which enrolled pregnant women after the 2011 phthalate-tainted-foodstuff episode. We aimed to examine the potential impacts of prenatal phthalate exposures on AGD and fetal sex steroid hormones in male and female newborns, respectively, and evaluate the mediation effect of cord-blood sex steroid hormones on the relationship between prenatal phthalate exposures and alterations of AGD at birth.

## Materials and methods

### Study cohort and study design

Our subjects were from the TMICS, as previously described in detail [7]. In brief, pregnant women in their third trimester at nine hospitals located in northern, central, southern, and eastern Taiwan between October 25, 2012 and May 21, 2015 were invited to participate in the TMICS. Participant inclusion and exclusion criteria are shown in Fig 1. Self-administered questionnaires, anthropometric measures, and bio-samples (i.e., urine and peripheral blood) were obtained from participants during the baseline interview. Umbilical cord-blood samples were immediately collected after babies born and stored at  $-20^{\circ}\text{C}$  until analysis. The study protocol was approved by the Institutional Review Board of the National Health Research Institute (NHRI) and our nine collaborating hospitals, the full names of the nine IRBs are listed in S1 Table. A written informed consent was obtained from each participant.

### Phthalate exposure

One-spot urine samples were collected during pregnancy at outpatient departments, delivered to the central laboratory at the NHRI, and certificated by an international laboratory comparison program (G-EQUAS 59) [7]. The concentrations ( $\mu\text{g/L}$ ) of eleven urinary phthalate metabolites were determined using a solid-phase extraction method coupled with liquid chromatography-electrospray ionization tandem mass spectrometry (LC-ESI-MS/MS, Agilent 1200/API 4000). The phthalate metabolites we measured included MEP, monomethyl phthalate (MMP), monoisobutyl phthalate (MiBP), monoisononyl phthalate (MiNP), mono-(2-ethyl-5-hydroxyhexyl) phthalate (MEHHP), mono-(2-ethyl-5-oxohexyl) phthalate (MEOHP), mono(2-ethyl-5-carboxypentyl) phthalate (MECPP), and mono(2-carboxymethylhexyl) phthalate (MCMHP) (Hsieh et al. 2019). In brief, we prepared 100  $\mu\text{L}$  urine sample aliquots containing 20  $\mu\text{L}$  ammonium acetate (1 M, pH 6.5), 10  $\mu\text{L}$   $\beta$ -glucuronidase, and a mixture of isotopic phthalate metabolite standards. The samples were incubated at  $37^{\circ}\text{C}$  for

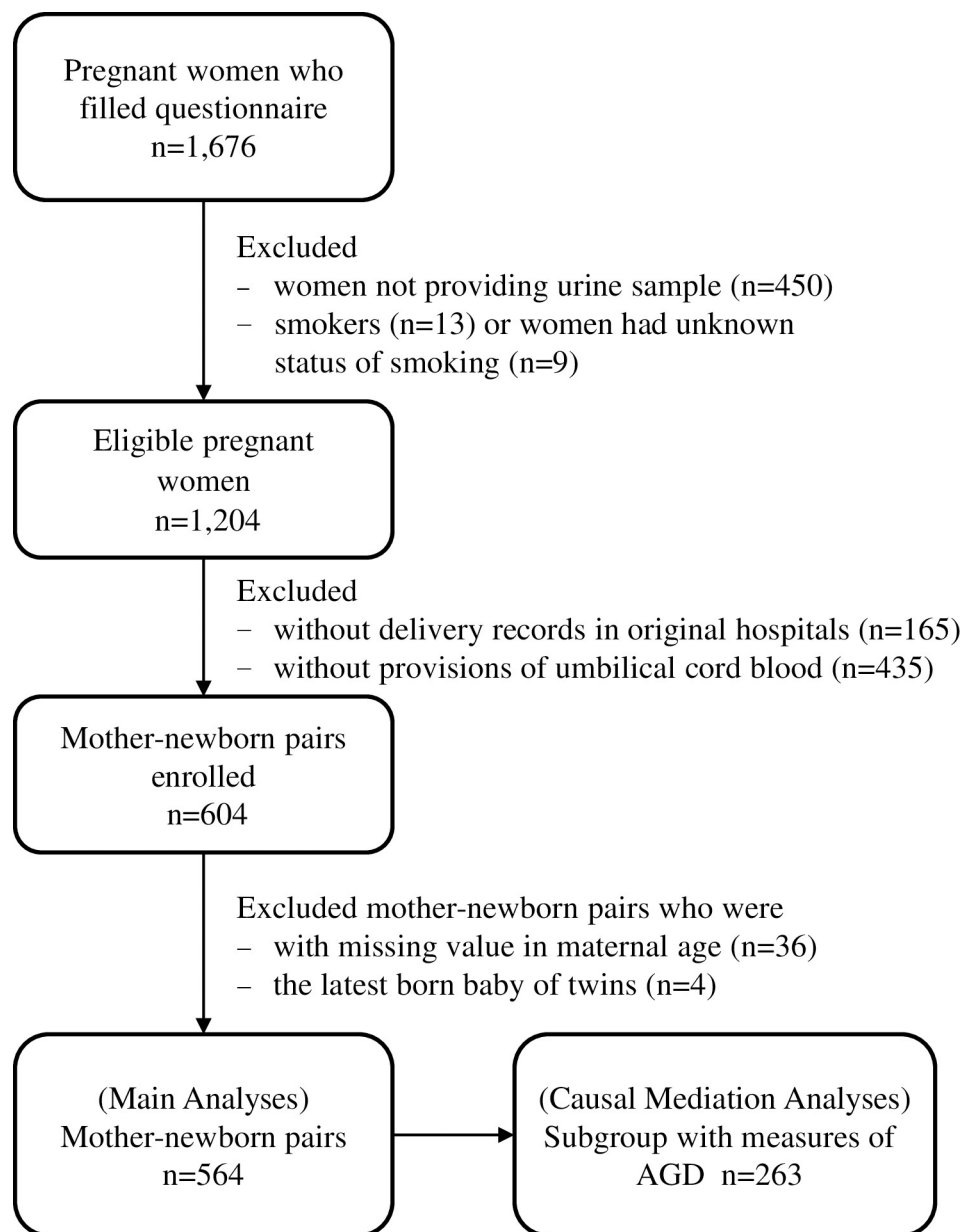

Fig 1. Flow chart of participants enrolled in this study.

<https://doi.org/10.1371/journal.pone.0297631.g001>

1.5 h and treated with 270  $\mu$ L solvent (5% acetonitrile and 0.1% formic acid) in glass screw-cap vials and mixed for quantitative LC-ESI-MS/MS after hydrolysis. For quality control, a blank sample's measured concentration below two-fold the limit of detection (LOD) value (LOD for MMP, MEP, MnBP, MiBP, MBzP, MiNP, MEHP, MEHHP, and MEOHP was: 0.12, 0.06, 0.06, 0.12, 0.06, 0.6, 0.12, 0.06, 0.12  $\mu$ g/L, respectively) for urinary metabolites was required. Each phthalate metabolite's recovery rate ranged from 80% to 119%. Phthalate metabolite concentrations below the LOD were assigned a value of 1/2 LOD.

Considering the urinary dilution effect, urinary phthalate metabolite levels were divided by urinary creatinine levels measured using the ADVIA 1800 Clinical Chemistry System (Siemens, Erlangen, Germany) at the Union Clinical Laboratory (UCL; Taipei, Taiwan). Because

MECPP and MCMHP tests were only available for limited study participants, we calculated the micromolar sum of MEHP, MEOHP, and MEHHP levels to estimate DEHP exposure ( $\Sigma$ DEHP).

### Anogenital distances

Among the 564 babies, 263 were assessed for their AGDs by trained neonatologists who had been trained by watching an instructional video. AGD was measured as the scrotum-to-anus distance in male newborns and the distance from the center of the anus to the posterior convergence of the fourchette in female newborns. Babies were kept in a supine position, and their legs were held back in a frog-leg posture to identify the central position of the anus. The basic AGD-measurement procedures followed the methods developed by the Infant Development and Environment Study [19]. Each AGD was measured twice per baby using a dial caliper and the averaged distance was used for data analysis.

### Sex steroid hormone concentrations

Clinical-biochemistry concentration were determined in radioimmunoassay (Diagnostic Products Corporation, Los Angeles, CA, USA) which was performed at UCL. The measures included five cord-blood sex steroid hormones, i.e., progesterone (ng/mL), E2 (pg/mL), frTT (ng/dL), sex hormone-binding globulin (SHBG, nmol/L), and follicle stimulating hormone (FSH, mIU/mL), as well as three maternal sex steroid hormones, i.e. progesterone (ng/mL), E2 (pg/mL), total testosterone (TT, ng/dL). The detection limit values of progesterone, FSH, E2, free TT, and SHBG were 30 ng/mL, 0.3 mIU/mL, 11.8 pg/mL, 0.04 ng/dL, and 0.35 nmol/L, respectively.

### Statistical methods

We used geometric mean with geometric standard deviation and median with interquartile range to describe right-skewed variables and the Kruskal–Wallis H test to compare differences between groups. We categorized phthalate metabolite levels into low, median, and high based on tertile cut-off points for all phthalate metabolites but MBzP. Because of lower detection rate of MBzP, we assigned undetectable MBzP levels as low and dichotomized detectable values as median and high. Linear regression model was performed to estimate the changes of AGD corresponding to exposure levels of phthalate metabolites from low-to-middle and low-to-high levels. According to literature review, basic sociodemographic characteristics (household income, maternal education status), maternal physical activity, birth outcomes, gestational diabetes in pregnancy, and delivery records were considered potential confounders. Finally, we used the directed acyclic graph (DAG) analysis to determine the covariates which should be correctly adjusted in multivariable regression analyses (S1 Fig). Because body size and age largely explain variation in AGD, the newborn's percentile of weight-for-length was included as a covariate [19] in predicting AGD. The norm of weight-for-length in the World Health Organization Growth Standard for babies 0–2 years of age [20] was applied. To explore the potential mediation, we additionally conducted general linear regression models to explore the associations of cord-blood and maternal sex hormone levels with newborn's AGD in S5 Table, the sex hormone levels were in natural logarithm scale in these analyses.

All data analyses were performed using SAS software (version 9.4; SAS Inc., Cary, NC, USA).

### Results

The present study recruited 564 mother-infant pairs from the TMICS (Fig 1). Table 1 shows the maternal urinary concentrations of MMP, MEP, MnBP, MiBP, MBzP, MiNP, and DEHP

Table 1. Prenatal exposure of phthalate metabolites in female and male newborns.

| Parent compound                  | Phthalate Metabolite          | Female newborns (N = 270)      |      |              | Male newborns (N = 294) |      |              | P-value             |
|----------------------------------|-------------------------------|--------------------------------|------|--------------|-------------------------|------|--------------|---------------------|
|                                  |                               | ( $\mu\text{g/g creatinine}$ ) | DR % | GM (GSD)     | Median (Q1-Q3)          | DR % | GM (GSD)     | Median (Q1-Q3)      |
| Di-methyl phthalate (DMP)        | MMP                           |                                | 94.8 | 6.89 (3.44)  | 7.79 (4.14–14.26)       | 93.5 | 7.52 (3.90)  | 8.95 (4.89–15.79)   |
| Diethyl phthalate (DEP)          | MEP                           |                                | 89.6 | 15.85 (7.35) | 19.22 (7.85–55.48)      | 89.8 | 16.54 (7.69) | 19.41 (7.75–54.77)  |
| Di-n-butyl phthalate (DnBP)      | MnBP                          |                                | 99.6 | 23.13 (2.40) | 22.53 (13.58–35.82)     | 98.3 | 21.84 (2.70) | 22.31 (13.26–35.7)  |
| Di-isobutyl phthalate (DiBP)     | MiBP                          |                                | 97.0 | 11.49 (2.59) | 11.77 (6.85–21.09)      | 97.6 | 11.41 (2.39) | 11.29 (7.26–18.65)  |
| Benzyl butyl phthalate (BBzP)    | MBzP                          |                                | 46.3 | 0.46 (5.12)  | 0.60 (0.60–1.42)        | 46.3 | 0.51 (5.66)  | 0.60 (0.60–1.71)    |
| Di-isononyl phthalate (DINP)     | MiNP                          |                                | 3.70 | 0.96 (2.01)  | 0.88 (0.57–1.58)        | 4.08 | 0.95 (2.01)  | 0.88 (0.58–1.51)    |
| Di-2-ethylhexyl phthalate (DEHP) | MEHP                          |                                | 79.3 | 3.64 (4.87)  | 4.97 (1.82–11.13)       | 79.6 | 3.75 (4.69)  | 5.06 (1.89–10.21)   |
|                                  | MEHHP                         |                                | 99.3 | 16.01 (2.43) | 16.13 (10.09–26.54)     | 99.3 | 16.4 (2.25)  | 16.09 (10.63–25.75) |
|                                  | MEOHP                         |                                | 98.2 | 13.54 (2.51) | 14.14 (8.33–24.05)      | 98.6 | 13.26 (2.28) | 13.69 (8.36–21.51)  |
|                                  | $\Sigma\text{DEHP}^{\dagger}$ |                                | NA   | 0.13 (2.37)  | 0.13 (0.08–0.21)        | NA   | 0.13 (2.20)  | 0.12 (0.08–0.20)    |
|                                  | MECPP $^{\ddagger}$           |                                | 98.9 | 22.74 (2.86) | 22.79 (15.15–38.12)     | 99.3 | 22.47 (2.21) | 22.46 (15.84–33.19) |
|                                  | MCMHP $^{\ddagger}$           |                                | 97.0 | 5.58 (2.77)  | 5.83 (3.75–9.25)        | 97.3 | 5.08 (2.52)  | 5.51 (4.02–7.92)    |

$^{\dagger}$   $\Sigma\text{DEHP}$  was estimated exposure of DEHP by summation of MEHP, MEHHP, and MEOHP and presented as  $\mu\text{mol/g creatinine}$ .

$^{\ddagger}$  Sample size was only 214 for the females and 222 for the males, respectively.

DR%, detection rate (% for values > limit of detection). GM, geometric mean. GSD, geometric standard deviation. NA, non-applicable.

<https://doi.org/10.1371/journal.pone.0297631.t001>

metabolites in male and female newborns. Phthalate metabolite detection rates were generally high, except for MiNP (4%) and MBzP (46%). We therefore did not include MiNP in subsequent analyses. Maternal concentrations of phthalate metabolites were similar between mothers who initially provided urines at the 3<sup>rd</sup> trimester and those who finally included in data analyses (S2 Fig). In-utero phthalate metabolite levels differed according to maternal age, education level, household income, exercise frequency, gestational weight gain, and term pregnancy (S2 Table).

Table 2 presents descriptive statistics of AGD and cord-blood sex steroid hormone levels. Among 564 newborns, 262 received AGD measures. Male newborns had significant higher

Table 2. Male and female newborn's anogenital distances, cord-blood and maternal sex steroid hormone levels.

| AGDs and sex steroid hormones | Male newborns (N = 294) |       |              |                         | Female newborns (N = 270) |       |              |                         | P -value |
|-------------------------------|-------------------------|-------|--------------|-------------------------|---------------------------|-------|--------------|-------------------------|----------|
|                               | n                       | DR %  | GM (GSD)     | Median (Q1-Q3)          | n                         | DR %  | GM (GSD)     | Median (Q1-Q3)          |          |
| Child's information           |                         |       |              |                         |                           |       |              |                         |          |
| - AGD (mm) <sup>a</sup>       | 141                     |       | 19.60 (6.39) | 19.15 (16.20–22.75)     | 122                       |       | 12.64 (4.36) | 12.23 (10.10–15.00)     |          |
| - Maternal hormones           |                         |       |              |                         |                           |       |              |                         |          |
| Progesterone (ng/mL)          | 273                     | 98.20 | 145.5±1.92   | 134.7 (101.5, 213.4)    | 244                       | 98.79 | 129.0±1.77   | 127.0 (87.74, 181.6)    | 0.011    |
| E2 (pg/mL)                    | 269                     | 96.76 | 14,472±1.99  | 14,675 (11,663, 19,647) | 244                       | 98.79 | 15,214±2.05  | 15,598 (12,836, 20,963) | 0.095    |
| TT (ng/dL)                    | 277                     | 99.64 | 90.02±1.65   | 93.00 (65.00, 124.0)    | 247                       | 100.0 | 90.02±1.60   | 86.00 (63.00, 124.0)    | 0.592    |
| - Cord-blood hormones         |                         |       |              |                         |                           |       |              |                         |          |
| Progesterone (ng/mL)          | 290                     | 98.64 | 804.3 (1.86) | 840.3 (614.9–1,141)     | 269                       | 99.63 | 772.8 (1.68) | 788.9 (582.5–1,072)     | 0.134    |
| E2 (pg/mL)                    | 289                     | 98.30 | 6,568 (1.93) | 7,088 (4,467–10,183)    | 269                       | 99.63 | 5,884 (2.03) | 6,250 (3,901–9,250)     | 0.076    |
| FSH (mIU/mL)                  | 291                     | 89.69 | 0.90 (2.36)  | 1.00 (0.60–1.60)        | 268                       | 56.72 | 0.36 (2.61)  | 0.35 (0.15–0.65)        | <0.001   |
| frTT (ng/dL)                  | 232                     | 78.91 | 4.22 (1.63)  | 4.29 (3.51–5.71)        | 205                       | 75.93 | 4.18 (1.80)  | 4.26 (3.23–5.93)        | 0.954    |
| SHBG (nmol/L)                 | 293                     |       | 38.47 (1.82) | 36.4 (30.9–46.8)        | 268                       |       | 33.74 (1.93) | 34.2 (26.1–42.9)        | <0.001   |

<sup>a</sup> AGD was only measured in a subgroup of study participants (n = 263). AGD, anogenital distance. DR, detection rate. GM, geometric mean. GSD, geometric standard deviation. E2, estradiol. TT, total testosterone. FSH, follicle stimulating hormone. frTT, free-form testosterone. SHBG, sex hormone-binding globulin. Q1, 1<sup>st</sup> quartile. Q3, 3<sup>rd</sup> quartile.

<https://doi.org/10.1371/journal.pone.0297631.t002>



Table 3. Associations of prenatal exposure of phthalate metabolites with AGD in male and female newborns.

| Phthalate metabolites ( $\mu\text{g/g}$ creatinine)    | Level <sup>a</sup> | Male newborns (n = 124) |                |       | Female newborns (n = 113) |               |       |
|--------------------------------------------------------|--------------------|-------------------------|----------------|-------|---------------------------|---------------|-------|
|                                                        |                    | Adjusted $\beta$        | (95% CI)       | P     | Adjusted $\beta$          | (95% CI)      | P     |
| MMP                                                    | M                  | -3.20                   | (-6.27, -0.13) | 0.041 | 0.89                      | (-1.03, 2.81) | 0.361 |
|                                                        | H                  | -1.73                   | (-4.72, 1.26)  | 0.253 | -1.82                     | (-3.86, 0.22) | 0.080 |
| MEP                                                    | M                  | -1.64                   | (-4.41, 1.13)  | 0.243 | -0.13                     | (-2.17, 1.92) | 0.902 |
|                                                        | H                  | -0.20                   | (-3.26, 2.86)  | 0.898 | 1.03                      | (-1.05, 3.12) | 0.329 |
| MnBP                                                   | M                  | 1.06                    | (-1.89, 4.01)  | 0.479 | 1.51                      | (-0.57, 3.6)  | 0.153 |
|                                                        | H                  | 0.31                    | (-2.78, 3.40)  | 0.843 | 1.93                      | (-0.24, 4.1)  | 0.080 |
| MiBP                                                   | M                  | 0.23                    | (-2.71, 3.16)  | 0.878 | 1.61                      | (-0.51, 3.72) | 0.135 |
|                                                        | H                  | 2.20                    | (-0.77, 5.16)  | 0.145 | 0.84                      | (-1.27, 2.95) | 0.432 |
| MBzP                                                   | M                  | -3.82                   | (-6.75, -0.88) | 0.011 | -0.37                     | (-2.36, 1.62) | 0.716 |
|                                                        | H                  | -1.27                   | (-3.96, 1.42)  | 0.351 | 0.54                      | (-1.53, 2.61) | 0.605 |
| MEHP                                                   | M                  | -2.18                   | (-5.14, 0.78)  | 0.147 | -0.38                     | (-2.34, 1.58) | 0.705 |
|                                                        | H                  | -2.21                   | (-5.38, 0.96)  | 0.171 | 1.15                      | (-0.93, 3.24) | 0.274 |
| MEHHP                                                  | M                  | -2.13                   | (-4.87, 0.61)  | 0.126 | -1.70                     | (-3.59, 0.19) | 0.077 |
|                                                        | H                  | -0.91                   | (-3.93, 2.10)  | 0.551 | 1.36                      | (-0.75, 3.47) | 0.205 |
| MEOHP                                                  | M                  | -3.70                   | (-6.40, -0.99) | 0.008 | -1.37                     | (-3.28, 0.53) | 0.155 |
|                                                        | H                  | -0.17                   | (-3.11, 2.77)  | 0.908 | 0.58                      | (-1.56, 2.73) | 0.590 |
| $\Sigma\text{DEHP}$<br>( $\mu\text{mol/g}$ creatinine) | M                  | -4.04                   | (-6.84, -1.24) | 0.005 | -1.71                     | (-3.57, 0.16) | 0.073 |
|                                                        | H                  | -2.22                   | (-5.25, 0.81)  | 0.150 | 0.71                      | (-1.46, 2.87) | 0.519 |

<sup>a</sup> Low exposure level as the reference.

$\Sigma\text{DEHP}$  was estimated exposure of DEHP by summation of MEHP, MEHHP, and MEOHP exposure level. M, median exposure level. H, highest exposure level.

Adjusted  $\beta$ , regression coefficient adjusted for maternal age at enrollment and maternal education status, household income, maternal exercise habit, and pre-pregnancy BMI. CI, confidence interval. P, p-value.

<https://doi.org/10.1371/journal.pone.0297631.t003>

cord-blood FSH and SHBG levels but similar progesterone, E2, and frTT levels than female newborns. Mothers with male babies had significantly higher serum progesterone but similar E2 and TT than mothers with female babies.

Table 3 shows the relationship between prenatal phthalate metabolites exposure and AGD in male and female newborns. In male newborns, median exposure levels of MMP, MBzP, MEOHP, and  $\Sigma\text{DEHP}$  were associated with 3.20 mm, 3.82 mm, 3.70 mm, and 4.04 mm shorter AGD compared with low exposure levels of these metabolites, respectively. Although the averaged AGDs in babies with high exposure levels of abovementioned phthalate metabolites were shorter than that in babies with low exposure levels, but the differences were not statistically significant. In female newborns, prenatal exposure levels of phthalate metabolites were not significantly associated with alterations of AGD. However, as we replaced the categorical phthalate metabolite levels with continuous concentrations in natural logarithm scale and reperformed the analyses, no phthalate metabolite was statistically significantly associated with AGDs in both male and female newborns (S3 Table).

Fig 2 shows the adjusted changes of cord-blood sex steroid hormones in male newborns, which were corresponding to median and high prenatal exposure levels compared to low exposure levels of phthalate metabolites. Higher exposure of MMP was associated with increased level of progesterone, frTT, and decreased level of SHBG. Higher exposure of MEP, MnBP, and MBzP were associated with decreased level of FSH. Higher exposure of MEHP, MEHHP, and MEOHP were associated with decreased levels of progesterone and SHBG, though only higher MEHP levels was associated with increased levels of frTT. Increased exposure of  $\Sigma\text{DEHP}$  was associated with decreased levels of progesterone, SHBG, and FSH.

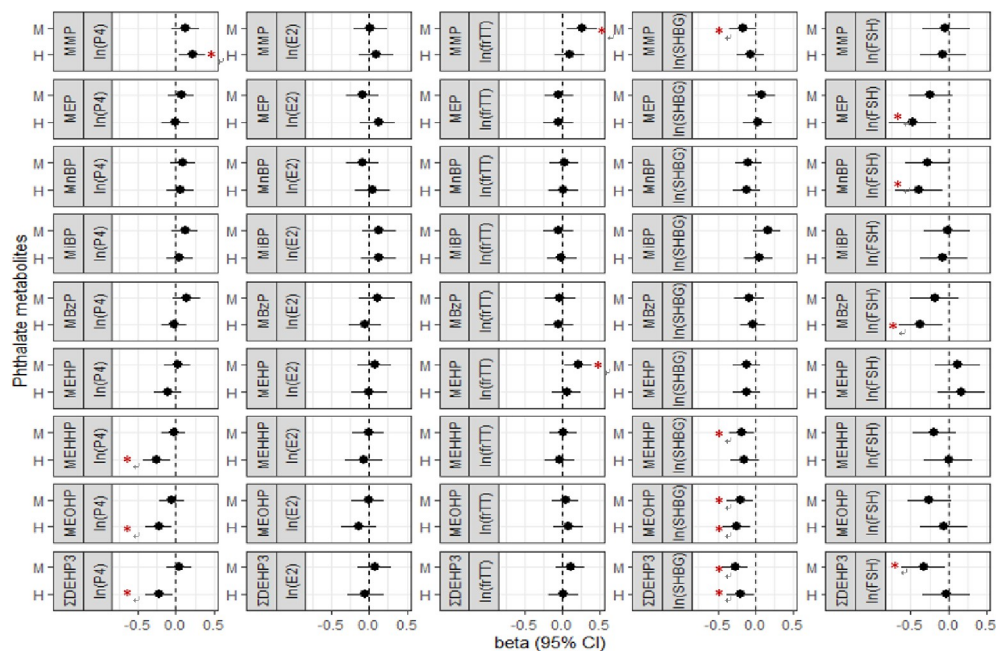

**Fig 2. Adjusted changes of male newborn's sex steroid hormones in log scale corresponding to exposure levels of phthalate metabolites from low to median or high levels, respectively.**  $\Sigma$ DEHP was estimated exposure of DEHP by summation of MEHP, MEHHP, and MEOHP exposure level. P4, progesterone. E2, estradiol. frTT, free-form testosterone. SHBG, sex hormone-binding globulin. FSH, follicle stimulating hormone. M, median exposure level. H, highest exposure level. CI, confidence interval. Beta, regression coefficient adjusted for maternal age at enrollment and maternal education status, household income, maternal exercise habit, and pre-pregnancy BMI.

<https://doi.org/10.1371/journal.pone.0297631.g002>

Similarly, **Fig 3** presents adjusted changes of cord-blood sex steroid hormones in female newborns. Higher exposure of MnBP was associated with increased level of progesterone and frTT. Higher exposures of MMP, MBzP, and MEHHP were associated with decreased level of FSH. Higher exposure to MEHP was associated with decreased level of progesterone and frTT but increased level of SHBG. However, as we replaced the categorical phthalate metabolite levels with continuous concentrations in natural logarithm scale and reperformed the analyses, some of the significant associations between phthalate metabolite levels and cord-blood sex steroid hormone levels became statistically insignificant in male and female newborns (**S4 Table**).

To exploring the potential mediation of cord-blood sex steroid hormones, we also examined the relationships between cord-blood and maternal sex steroid hormone and AGD in **S5 Table**. Almost all sex hormones tended to be inversely associated with AGD in male and female newborns respectively, but none of them achieved statistically significance.

## Discussions

Our study results confirmed the associations between maternal urinary phthalate metabolites and alterations in AGD in male newborns and reported no significant association in female newborns. We also found interference of maternal phthalate exposure on cord-blood sex steroid hormones. Despite interference of phthalates on sex hormones had been widely reported among children, adolescents, and adults, studies examining the effect of maternal phthalate exposure on fetus hormones are quite limited [16]. However, we failed to link cord-blood and maternal sex hormone levels to the alterations of AGDs in our study. What other factors might mediate the effect of prenatal exposures to phthalates on newborn's AGD needs further investigations.



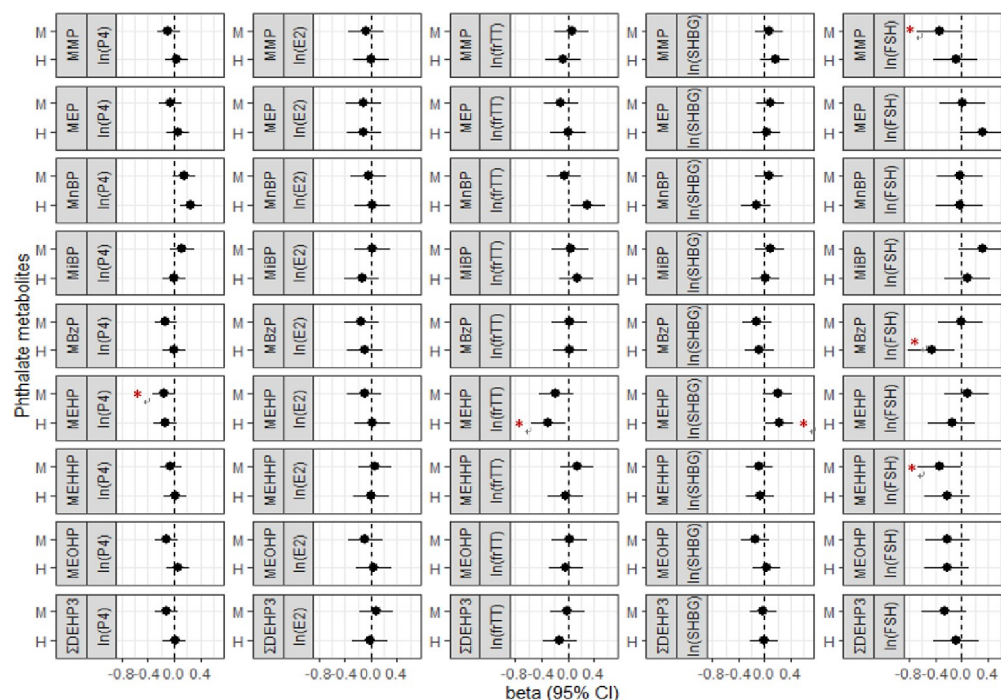

**Fig 3. Adjusted changes of female newborn's sex steroid hormones in log scale corresponding to exposure levels of phthalate metabolites from low to median or high levels, respectively.**  $\Sigma$ DEHP was estimated exposure of DEHP by summation of MEHP, MEHHP, and MEOHP exposure level. P4, progesterone. E2, estradiol. frTT, free-form testosterone. SHBG, sex hormone-binding globulin. FSH, follicle stimulating hormone. M, median exposure level. H, highest exposure level. CI, confidence interval. Beta, regression coefficient adjusted for maternal age at enrollment and maternal education status.

<https://doi.org/10.1371/journal.pone.0297631.g003>

### Alterations of AGD associated with prenatal phthalate exposures

Decreased AGD is a sensitive marker detecting anti-androgen effect [14]. Our study reported that median levels of maternal MMP, MBzP, MEOHP, and  $\Sigma$ DEHP were associated with shortened AGD in male newborns, which was aligned with findings in past literatures. Previous studies have reported that a shorter AGD was related to prenatal DEHP and DMP exposure [10, 11, 17] and anopenile distance was negatively associated with in-utero MEP, MiBP, and MBP [21] in male newborns. The underlying mechanism has been related to phthalates' anti-androgen effect such as testosterone inhibition in the animal studies. Male litters of rat dams gavaged with high doses of DEHP or butyl benzyl phthalate were more likely to have shorter AGD and reduced testis weights [22, 23], suppressed fetal testosterone [23], and malformation of reproductive systems [15, 22]. However, evidence gap exists in the female newborns due to limited amounts of studies reported in females [16]. Our study findings were aligned to the only available epidemiologic studies in the past, neither of which found a significant effect of maternal exposure of phthalates on the females' AGD at birth [11, 24–26]. However, we observed borderline significant increased AGD and borderline significant decreased AGD in female babies with median maternal MiBP and MEHHP, respectively. There was also a meta-analysis showing an increased female's AGD in female babies with higher maternal MBzP levels [21]. Although the effect of maternal phthalate exposure on female's AGD at birth seems not to be so pronounced as that in males, more studies with sufficient sample size for baby girls are expected to further confirm the effect in females.

## Associations between maternal urinary phthalate metabolites and cord-blood sex steroid hormones

Evidences have widely suggested that the reproductive toxicity of phthalates involves dysfunction of hypothalamic-pituitary-gonadal (HPG) axis [27]. Although the actual mechanism is still unclear, the reproductive toxicity of phthalates may be associated with its anti-androgenic property and seems to be more frequently reported in males than in females [17, 28]. The upstream changes in HPG are associated with the abnormal expressions of peroxisome proliferator-activated receptors, aryl hydrocarbon receptors, and insulin receptors, which may alter the release of gonadal-releasing hormones and gonadotropins and induce cell damages [29], subsequently disrupt synthesis of sex steroid hormones and functions or morphologic changes of reproductive organ. The reproductive disrupting effect of phthalates can be even transgenerational to the unexposed offspring in animal studies, but it still needs further confirmed in humans [27, 30].

To the best of our knowledge, there were only two previous studies investigating the effect of maternal phthalate exposures on cord-blood sex steroid hormones [12, 13] and a cross-sectional study which measured phthalate metabolites and fetal hormone levels in amniotic fluid [31]. Among the two studies measured hormone levels in cord-blood, one study measured phthalate metabolites in maternal serum [12], another study was the only one measured phthalate metabolites in maternal urine which is now considered as the most appropriate matrix for phthalate exposure assessment [13]. Lin and colleagues analyzed the data of a birth cohort study conducted in 2001 in Taiwan, it was about ten years before the 2011 phthalate-tainted foodstuff episode uncovered in Taiwan. Our study enrolled study participants in 2012, at the time the control measures had been intervened. After that time, phthalate exposures in pregnant women have been reduced. The median levels of MEHP and DEHP in our study cohort (MEHP 5.0  $\mu\text{g/g}$  creatinine, DEHP 0.13  $\mu\text{mol/g}$  creatinine) was lower than that in Lin's study (19.1  $\mu\text{g/g}$  creatinine, DEHP 0.14  $\mu\text{mol/g}$  creatinine, measured in 2000–2001) [13] and Kuo's study (11.9  $\mu\text{g/g}$  creatinine, DEHP 0.19  $\mu\text{mol/g}$  creatinine, measured in 2009) in Taiwan [32] (S3 Fig).

Although maternal phthalate metabolites levels in our study were lower than that in previous studies in Taiwan, most phthalate metabolites were among the levels reported from Japan and US (S3 Fig). Under the exposure levels reported in our study, we found that maternal DEHP metabolites were in an inverse relationship with cord-blood progesterone and FSH in male and female newborns. FSH stimulate Sertoli cells proliferation and sperms production with testosterone (TT) in prepuberty [33]. Our findings were consistent with experimental study that showed reduced Sertoli cell number and inhibited cell proliferations in rodents gavaged with DEHP [34]. It was also partially aligned with Araki's study findings in HCS. Araki et al. found an inverse association of serum MEHP with cord-blood progesterone and inhibin B (an FSH-regulated functional marker secreted by Sertoli cells in testes), but not with FSH levels, in male newborns [12]. Their findings may suggest a functional reduction of Sertoli cells associated with maternal DEHP levels in serum. Jensen et al. only examined effects of MECPP in male newborns since it was the most abundant metabolite of DEHP detected in amniotic fluid. In contrary to our findings, their study observed an increased progesterone associated with higher MECPP [31]. However, the study determined the sex hormones levels in amniotic fluid samples; their observations may not be directly compared with our study results. The anti-androgen effect of DEHP has been widely observed in cross-sectional study in adults [35, 36]. However, our study also observed that elevated maternal DEHP metabolites was associated with higher cord-blood frTT and lower SHBG in male newborns as well as lower frTT and higher SHBG in female newborns. The tendency toward decreased frTT of maternal

phthalate exposures in female newborns has also been observed in Lin's study, which showed an inverse association between maternal DEHP exposure and cord-blood frTT and frTT/E2 in female newborns, but they did not find that association in male newborns [13]. Jensen's study findings in male fetuses were similar to ours, showing that amniotic fluid MECP levels were positively associated with TT levels [31]. Araki's study did not find any significant effect of maternal serum MEHP on cord-blood TT, SHBG and TT/SHBG levels both in males and females [12]. Similar to DEHP, maternal MMP was also related to higher cord-blood frTT and lower SHBG in male newborns but not in female newborns in our study. Araki's study and Jensen's study did not report the effect of MMP. The limited previous studies showed that maternal MMP was not associated with frTT, TT, or frTT/E2 levels in cord-blood [13] and in 2-, 5-, 8-, and 11-year-old children's serum [37]. In terms of cord-blood frTT and SHBG, our study seemed to suggest an androgenic effect in males and anti-androgenic effect in females of maternal DEHP and MMP, in contrary to the effect in adults or cross-sectional study. The underlying mechanism of our study results is unclear and needs further study to confirm.

Our study revealed that cord-blood FSH levels were the most affected sex hormone by maternal phthalate exposures. We particularly noted that both male and female's cord-blood FSH levels decreased as maternal MBzP increased. Similar results have been found in a study assessing sex hormones levels in minipuberty [38]. FSH stimulates Sertoli cells proliferation and promotes sperm production with TT in prepuberty [33]. In male adults, MBzP was reported to be negatively associated with lower sperm concentration [39] and lower sperm motility [17]. Our study findings suggest that prenatal MBzP exposure may inhibit early reproductive tract development in male and female newborns.

Pregnant women were suggested to avoid consume the packaged food with unsafe plastic wrap or containers [2, 40], and reduce the use of PCPs, i.e., body lotion, perfume, lip stick. . . etc., particularly the leave-on items [41, 42] and the products with long lasting fragrance. The careful consumption of packaged food and selective use of PCPs may protect themselves and their babies to minimize exposure levels of phthalates.

## Strengths and limitations

Our study has several strengths. First, this study was one of the few cohort studies investigating the hormone-disrupting effect of prenatal phthalate exposure on cord-blood sex hormones and the associations between cord-blood sex hormones and AGD in newborns. Second, our study provided an opportunity to continually monitor the impact of relatively low prenatal phthalate exposure on fetal development after the 2011 phthalate-tainted-foodstuff episode in Taiwan. Third, we examined the babies' cord-blood sex hormone concentrations, avoiding confounding effect of postnatal exposures of hormone-disrupting chemicals in environment.

Our study has certain limitations. First, we only collected one-spot urine samples in the third trimester, which may not fully represent the average phthalate-exposure level during pregnancy or the effective exposure levels on alteration of AGD at birth. A subset of participants ( $n = 142$ ) in our study who provided urine samples in each trimester of pregnancy showed a weak-to-moderate consistency of DEHP metabolites between the third and first trimesters (Spearman's correlation coefficient [ $\rho$ ] 0.23 [MEHP]–0.28 [MEMHP]) and between the third and second trimesters ( $\rho$  0.17 [MEHP]–0.42 [MEHHP]), indicating the likelihood of phthalate-exposure misclassifications in our study; nevertheless, the misclassifications should be non-differential and biased observed associations toward the null. Second, our study sample size may not be sufficient and thus reduced the statistical power in some analyses. Third, as we replaced the categorical form of phthalate metabolite levels with continuous concentrations, the significant associations between prenatal phthalate metabolite levels and male newborn's

AGD became statistically insignificant. We believed that might be partly resulted from limited sample size in our study. Another possible reason might be that the potential non-linear non-monotonic effects of phthalates on AGD were obscured in linear models. However, whether the relationships between prenatal phthalate exposures in such relative low levels were non-linearly associated with newborn's AGD should be further validated.

## Conclusions

Our study observed that maternal urinary levels of MMP, MBzP, and DEHP metabolites at the 3<sup>rd</sup> trimester were associated with shortened AGD in male newborns. However, neither cord-blood or maternal sex steroid hormones significantly associated with newborn's AGD. We also found the hormone-disrupting effect of prenatal phthalate exposure on cord-blood sex hormones, particularly interference of MMP, MnBP, MBzP and DEHP-metabolites on FSH should be of concern. Women aspiring for pregnancy should be alerted to the need for reduction of phthalate exposures, such as contaminated food [2, 40], spray paints, and leave-on PCP [41, 42].

## Supporting information

**S1 Fig.** Directed acyclic graph (DAG) showing study framework and adjusted variables to elucidate causal relationship of prenatal phthalate exposure with newborns' sex hormones (a) and newborns' AGDs (b).

(TIF)

**S2 Fig.** Maternal concentrations of phthalate metabolites between mothers who initially provided urinary samples at the 3<sup>rd</sup> trimester (n = 1204) and those who included in data analyses (n = 564 and n = 263).

(TIF)

**S3 Fig.** The median maternal concentrations of phthalate metabolites in pregnant women in our study and in previous literatures.

(TIF)

**S1 Table.** Project title and approval numbers from Institutional Review Boards in National Health Research Institute and 9 collaborated hospitals.

(DOCX)

**S2 Table.** Maternal sociodemographic characteristics and birth outcomes in association with in-utero exposure of phthalate metabolites.

(DOCX)

**S3 Table.** Associations of prenatal phthalate metabolite levels in natural log scale with AGDs in male and female newborns.

(DOCX)

**S4 Table.** Associations of maternal phthalate metabolites levels with cord-blood sex steroid hormone levels in male and female newborns.

(DOCX)

**S5 Table.** Associations of products of cord-blood sex hormones and maternal sex hormone concentrations with AGD in male and female newborns.

(DOCX)

## S1 Graphical abstract. (TIF)

## Acknowledgments

We thank all members of the research team as the following list, who participated in the consortium of the TMICS cohort study.

**Northern area:** Drs Yen-An Tsai, Yu-Fang Huang, and Kai-Wei Liao from National Yang Ming University, Taipei, Taiwan; Dr Ming-Song Tsai from Department of Obstetrics and Gynecology, Cathay General Hospital, Taipei, Taiwan; Dr Chih-Yao Chen from Division of Obstetrics and High Risk Pregnancy, Department of Obstetrics and Gynecology, Taipei Veterans General Hospital, Taipei, Taiwan; Dr Pei-Wei Wang from Department of Pediatrics, Taipei City Hospital, Heping Fuyou Branch, Taipei, Taiwan; Dr Li-Wei Huang from Department of Obstetrics & Gynecology, Taipei City Hospital, Heping Fuyou Branch, Taipei, Taiwan.

**Central area:** Ms Hui-Chun Chen and the obstetricians and pediatricians for subject recruitments, data collections and specimen collections: Dr Ying-Chih Tseng from the Department of Obstetrics and Gynecology, Hsinchu Cathay General Hospital, Hsinchu, Taiwan; Dr Chaw-Liang Chang from the Department of Pediatrics, Hsinchu Cathay General Hospital, Hsinchu, Taiwan; Dr Tsung-Ho Ying from the Department of Obstetrics and Gynecology, Chung Shan Medical University Hospital, Taichung, Taiwan; Dr Pen-Hua Su from Department of Pediatrics, Chung Shan Medical University Hospital, Taichung, Taiwan; Dr Kuei-Cheng Hsu from the Department of Obstetrics and Gynecology, Changhua Christian Hospital, Changhua, Taiwan; Dr Hsiao-Neng Chen and Dr Jian-Wun Cien from Department of Pediatrics, Changhua Christian Hospital, Changhua, Taiwan.

**Southern area:** Ms Shiang-Shiun Chen, Yun-Shan Tsai, Sheng-Wen Su, Ching-Yi Chen, and the obstetricians and pediatricians for subject recruitments, data collections, and specimen collections: Dr Fu-Chen Kuo from Department of Gynecology and Obstetrics, E-Da Hospital, Kaohsiung, Taiwan; Dr Chien-Yi Wu from Department of Pediatrics, E-Da Hospital, Kaohsiung, Taiwan; Dr Yung-Hung Chen from Department of Obstetrics and Gynecology, Kaohsiung Municipal Hsiao-Kang Hospital, Kaohsiung, Taiwan; Dr Chiu-Lin Wang from Department of Obstetrics and Gynecology, Kaohsiung Municipal Hsiao-Kang Hospital, Kaohsiung, Taiwan; Dr Cheng-Yu Long from Department of Obstetrics and Gynecology, Kaohsiung Medical University Hospital, Kaohsiung, Taiwan; Dr Chih-Hsing Hung from Department of Pediatrics, Kaohsiung Municipal Hsiao-Kang Hospital, Kaohsiung, Taiwan; Dr Wei-Der Lee from Department of Pediatrics, Kaohsiung Medical University Hospital, Kaohsiung, Taiwan; Ms Chun-Chi Huang from Department of Medicine Laboratory, Kaohsiung Municipal Hsiao-Kang Hospital, Kaohsiung, Taiwan.

**Eastern area:** Dr Yu-Hsun Chang from Department of Pediatrics, Buddhist Tzu Chi General Hospital, Hualien, Taiwan; Dr Sheng-Po Kao and Dr Yu-Chi Wei from Department of Obstetrics and Gynecology, Buddhist Tzu Chi General Hospital, Hualien, Taiwan; Dr Anren Hu from Department of Laboratory Medicine and Biotechnology, Tzu Chi University, Hualien, Taiwan.

## Author Contributions

**Conceptualization:** Chin-Li Lu, Hui-Ju Wen, Mei-Lien Chen, Chia-Jung Hsieh, Ming-Tsang Wu, Shu-Li Wang.

**Formal analysis:** Chin-Li Lu.

**Funding acquisition:** Shu-Li Wang.

**Investigation:** Hui-Ju Wen, Mei-Lien Chen, Chien-Wen Sun, Chia-Jung Hsieh, Ming-Tsang Wu, Shu-Li Wang.

**Methodology:** Chin-Li Lu, Hui-Ju Wen, Mei-Lien Chen, Chien-Wen Sun, Chia-Jung Hsieh, Ming-Tsang Wu, Shu-Li Wang.

**Project administration:** Chien-Wen Sun.

**Resources:** Mei-Lien Chen, Chia-Jung Hsieh, Ming-Tsang Wu, Shu-Li Wang.

**Software:** Chin-Li Lu.

**Supervision:** Shu-Li Wang.

**Validation:** Chin-Li Lu, Chien-Wen Sun, Shu-Li Wang.

**Writing – original draft:** Chin-Li Lu.

**Writing – review & editing:** Hui-Ju Wen, Mei-Lien Chen, Chien-Wen Sun, Chia-Jung Hsieh, Ming-Tsang Wu, Shu-Li Wang.

## References

1. Fierens T, Servaes K, Van Holderbeke M, et al. Analysis of phthalates in food products and packaging materials sold on the Belgian market. *Food Chem Toxicol.* 2012; 50: 2575–83. <https://doi.org/10.1016/j.fct.2012.04.029> PMID: 22554646
2. Schecter A, Lorber M, Guo Y, et al. Phthalate concentrations and dietary exposure from food purchased in New York State. *Environ Health Perspect.* 2013; 121: 473–94. <https://doi.org/10.1289/ehp.1206367> PMID: 23461894
3. Bang du Y, Lee IK, Lee BM. Toxicological characterization of phthalic Acid. *Toxicol Res.* 2011; 27: 191–203. <https://doi.org/10.5487/TR.2011.27.4.191> PMID: 24278572
4. Tabb MM, Blumberg B. New modes of action for endocrine-disrupting chemicals. *Mol Endocrinol.* 2006; 20: 475–82. <https://doi.org/10.1210/me.2004-0513> PMID: 16037129
5. Warembourg C, Binter AC, Giton F, et al. Prenatal exposure to glycol ethers and sex steroid hormones at birth. *Environ Int.* 2018; 113: 66–73. <https://doi.org/10.1016/j.envint.2018.01.013> PMID: 29421409
6. Monti M, Fasano M, Palandri L, Righi E. A review of European and international phthalates regulation: focus on daily use products: Marco Monti. *Eur J Public Health.* 2022; 32(Suppl 3).
7. Wu CF, Chen HM, Sun CW, et al. Cohort Profile: The Taiwan Maternal and Infant Cohort Study (TMICS) of phthalate exposure and health risk assessment. *Int J Epidemiol.* 2018; 47: 1047–1047j. <https://doi.org/10.1093/ije/dyy067> PMID: 29718277
8. Tsai YA, Tsai MS, Hou JW, et al. Evidence of high di(2-ethylhexyl) phthalate (DEHP) exposure due to tainted food intake in Taiwanese pregnant women and the health effects on birth outcomes. *Sci Total Environ.* 2018; 618: 635–44. <https://doi.org/10.1016/j.scitotenv.2017.07.175> PMID: 29055577
9. Swan SH, Main KM, Liu F, et al. Decrease in anogenital distance among male infants with prenatal phthalate exposure. *Environ Health Perspect.* 2005; 113: 1056–61. <https://doi.org/10.1289/ehp.8100> PMID: 16079079
10. Suzuki Y, Yoshinaga J, Mizumoto Y, Serizawa S, Shiraishi H. Foetal exposure to phthalate esters and anogenital distance in male newborns. *Int J Androl.* 2012; 35: 236–44. <https://doi.org/10.1111/j.1365-2605.2011.01190.x> PMID: 21696396
11. Swan SH, Sathyanarayana S, Barrett ES, et al. First trimester phthalate exposure and anogenital distance in newborns. *Hum Reprod.* 2015; 30: 963–72. <https://doi.org/10.1093/humrep/deu363> PMID: 25697839
12. Araki A, Mitsui T, Miyashita C, et al. Association between maternal exposure to di(2-ethylhexyl) phthalate and reproductive hormone levels in fetal blood: the Hokkaido study on environment and children's health. *PLoS One.* 2014; 9: e109039. <https://doi.org/10.1371/journal.pone.0109039> PMID: 25296284
13. Lin S, Ku HY, Su PH, et al. Phthalate exposure in pregnant women and their children in central Taiwan. *Chemosphere.* 2011; 82: 947–55. <https://doi.org/10.1016/j.chemosphere.2010.10.073> PMID: 21075419



14. Welsh M, Saunders PT, Fisker M, et al. Identification in rats of a programming window for reproductive tract masculinization, disruption of which leads to hypospadias and cryptorchidism. *J Clin Invest*. 2008; 118: 1479–90. <https://doi.org/10.1172/JCI34241> PMID: 18340380
15. Howdeshell KL, Furr J, Lambright CR, Rider CV, Wilson VS, Gray LE Jr. Cumulative effects of dibutyl phthalate and diethylhexyl phthalate on male rat reproductive tract development: altered fetal steroid hormones and genes. *Toxicol Sci*. 2007; 99: 190–202. <https://doi.org/10.1093/toxsci/kfm069> PMID: 17400582
16. Eales J, Bethel A, Galloway T, et al. Human health impacts of exposure to phthalate plasticizers: An overview of reviews. *Environ Int*. 2022; 158:106903. <https://doi.org/10.1016/j.envint.2021.106903> PMID: 34601394
17. Radke EG, Braun JM, Meeker JD, Cooper GS. Phthalate exposure and male reproductive outcomes: A systematic review of the human epidemiological evidence. *Environ Int*. 2018; 121(Pt 1): 764–93. <https://doi.org/10.1016/j.envint.2018.07.029> PMID: 30336412
18. Araki A, Mitsui T, Goudarzi H, et al. Prenatal di(2-ethylhexyl) phthalate exposure and disruption of adrenal androgens and glucocorticoids levels in cord blood: The Hokkaido Study. *Sci Total Environ*. 2017; 581–582: 297–304. <https://doi.org/10.1016/j.scitotenv.2016.12.124> PMID: 28043700
19. Sathyanarayana S, Grady R, Redmon JB, et al. Anogenital distance and penile width measurements in The Infant Development and the Environment Study (TIDES): methods and predictors. *J Pediatr Urol*. 2015; 11: 76.e1–6. <https://doi.org/10.1016/j.jpuro.2014.11.018> PMID: 25824881
20. World Health Organization. WHO Child Growth Standards—weight for length/height: Birth to 2 years. Accessed 2020/11/30, <https://www.who.int/tools/child-growth-standards/standards/weight-for-length-height>.
21. Zarean M, Keikha M, Feizi A, Kazemitabae M, Kelishadi R. The role of exposure to phthalates in variations of anogenital distance: A systematic review and meta-analysis. *Environ Pollut*. 2019; 247: 172–9. Wolf C, Jr., Lambright C, Mann P, et al. Administration of potentially antiandrogenic pesticides (procymidone, linuron, iprodione, chlozolinate, p,p'-DDE, and ketoconazole) and toxic substances (dibutyl- and diethylhexyl phthalate, PCB 169, and ethane dimethane sulphonate) during sexual differentiation produces diverse profiles of reproductive malformations in the male rat. *Toxicol Ind Health*. 1999; 15(1–2): 94–118. <https://doi.org/10.1016/j.envpol.2019.01.026> PMID: 30677661
22. Wolf C Jr, Lambright C, Mann P, et al. Administration of potentially antiandrogenic pesticides (procymidone, linuron, iprodione, chlozolinate, p,p'-DDE, and ketoconazole) and toxic substances (dibutyl- and diethylhexyl phthalate, PCB 169, and ethane dimethane sulphonate) during sexual differentiation produces diverse profiles of reproductive malformations in the male rat. *Toxicol Ind Health*. 1999; 15(1–2): 94–118. <https://doi.org/10.1177/074823379901500109> PMID: 10188194
23. Parks LG, Ostby JS, Lambright CR, et al. The plasticizer diethylhexyl phthalate induces malformations by decreasing fetal testosterone synthesis during sexual differentiation in the male rat. *Toxicol Sci*. 2000; 58: 339–49. <https://doi.org/10.1093/toxsci/58.2.339> PMID: 11099646
24. Adibi JJ, Lee MK, Naimi AI, et al. Human Chorionic Gonadotropin Partially Mediates Phthalate Association With Male and Female Anogenital Distance. *J Clin Endocrinol Metab*. 2015; 100(9):E1216–E1224. <https://doi.org/10.1210/jc.2015-2370> PMID: 26200238
25. Barrett ES, Parlett LE, Sathyanarayana S, Redmon JB, Nguyen RH, Swan SH. Prenatal Stress as a Modifier of Associations between Phthalate Exposure and Reproductive Development: results from a Multicentre Pregnancy Cohort Study. *Paediatr Perinat Epidemiol*. 2016; 30: 105–14. <https://doi.org/10.1111/ppe.12264> PMID: 26576028
26. Wenzel AG, Bloom MS, Butts CD, et al. Influence of race on prenatal phthalate exposure and anogenital measurements among boys and girls. *Environ Int*. 2018; 110:61–70. <https://doi.org/10.1016/j.envint.2017.10.007> PMID: 29097052
27. Dubey P, Reddy SY, Singh V, et al. Association of Exposure to Phthalate Metabolites With Sex Hormones, Obesity, and Metabolic Syndrome in US Women. *JAMA Netw Open*. 2022; 5:e2233088 <https://doi.org/10.1001/jamanetworkopen.2022.33088> PMID: 36149653
28. Radke EG, Glenn BS, Braun JM, Cooper GS. Phthalate exposure and female reproductive and developmental outcomes: a systematic review of the human epidemiological evidence. *Environ Int*. 2019 Sep; 130:104580. <https://doi.org/10.1016/j.envint.2019.02.003> PMID: 31351310
29. Zhang Y, Yang Y, Tao Y, Guo X, Cui Y, Li Z. Phthalates (PAEs) and reproductive toxicity: Hypothalamic-pituitary-gonadal (HPG) axis aspects. *J Hazard Mater*. 2023; 459:132182 <https://doi.org/10.1016/j.jhazmat.2023.132182> PMID: 37557049
30. Brehm E, Flaws JA. Transgenerational Effects of Endocrine-Disrupting Chemicals on Male and Female Reproduction. *Endocrinology*. 2019; 160:1421–1435. <https://doi.org/10.1210/en.2019-00034> PMID: 30998239

31. Jensen MS, Anand-Ivell R, Nørgaard-Pedersen B, et al. Amniotic fluid phthalate levels and male fetal gonad function. *Epidemiology*. 2015; 26:91–99. <https://doi.org/10.1097/EDE.0000000000000198> PMID: 25384265
32. Kuo FC, Su SW, Wu CF, et al. Relationship of urinary phthalate metabolites with serum thyroid hormones in pregnant women and their newborns: a prospective birth cohort in Taiwan. *PLoS One*. 2015; 10(6):e0123884. Published 2015 Jun 4. <https://doi.org/10.1371/journal.pone.0123884> PMID: 26042594
33. Kaprara A., Huhtaniemi I.T., 2018. The hypothalamus-pituitary-gonad axis: tales of mice and men. *Metabolism* 86, 3–17. <https://doi.org/10.1016/j.metabol.2017.11.018> PMID: 29223677
34. Li LH, Jester WF Jr, Laslett AL, Orth JM (2000) A single dose of di-(2-ethylhexyl) phthalate in neonatal rats alters gonocytes, reduces sertoli cell proliferation, and decreases cyclin d2 expression. *Toxicol Appl Pharmacol* 166:222–229. <https://doi.org/10.1006/taap.2000.8972> PMID: 10906286
35. Chang WH, Li SS, Wu MH, Pan HA, Lee CC. Phthalates might interfere with testicular function by reducing testosterone and insulin-like factor 3 levels. *Hum Reprod*. 2015; 30(11):2658–2670. <https://doi.org/10.1093/humrep/dev225> PMID: 26385792
36. Meeker JD, Calafat AM, Hauser R. Urinary metabolites of di(2-ethylhexyl) phthalate are associated with decreased steroid hormone levels in adult men. *J Androl*. 2009; 30:287–297. <https://doi.org/10.2164/jandrol.108.006403> PMID: 19059903
37. Wen HJ, Sie L, Su PH, et al. Prenatal and childhood exposure to phthalate diesters and sex steroid hormones in 2-, 5-, 8-, and 11-year-old children: A pilot study of the Taiwan Maternal and Infant Cohort Study. *J Epidemiol*. 2017; 27: 516–523. <https://doi.org/10.1016/j.je.2016.10.009> PMID: 28576446
38. Muerkoster AP, Frederiksen H, Juul A, et al. Maternal phthalate exposure associated with decreased testosterone/LH ratio in male offspring during mini-puberty. *Odense Child Cohort. Environ Int*. 2020; 144:106025.
39. Pan Y, Jing J, Dong F, et al. Association between phthalate metabolites and biomarkers of reproductive function in 1066 Chinese men of reproductive age. *J Hazard Mater*. 2015; 300: 729–736. <https://doi.org/10.1016/j.jhazmat.2015.08.011> PMID: 26296076
40. Wittassek M, Koch HM, Angerer J, Brüning T. Assessing exposure to phthalates—the human biomonitoring approach. *Mol Nutr Food Res*. 2011; 55:7–31. <https://doi.org/10.1002/mnfr.201000121> PMID: 20564479
41. Hsieh CJ, Chang YH, Hu A, et al. Personal care products use and phthalate exposure levels among pregnant women. *Sci Total Environ*. 2019; 648: 135–43. <https://doi.org/10.1016/j.scitotenv.2018.08.149> PMID: 30114584
42. Wormuth M, Scheringer M, Vollenweider M, Hungerbühler K. What are the sources of exposure to eight frequently used phthalic acid esters in Europeans? *Risk Anal*. 2006; 26: 803–24. <https://doi.org/10.1111/j.1539-6924.2006.00770.x> PMID: 16834635
